# Supplementary material for: Bendable graphene/conducting polymer hybrid films for freestanding electrodes with high volumetric capacitances
Source: Royal Society of Chemistry journal article supplement (doi:10.1039/c5ra24606g), 2015-12-22
Supplement: c5ra24606g1.pdf [file c5ra24606g1.pdf]

*Electronic Supplementary Information (ESI) for*

## **Bendable Graphene/Conducting Polymers Hybrid Films for Freestanding Electrodes with High Volumetric Capacitances**

Lu Mao<sup>#</sup>, Meng Li<sup>#</sup>, Junmin Xue and John Wang<sup>\*</sup>

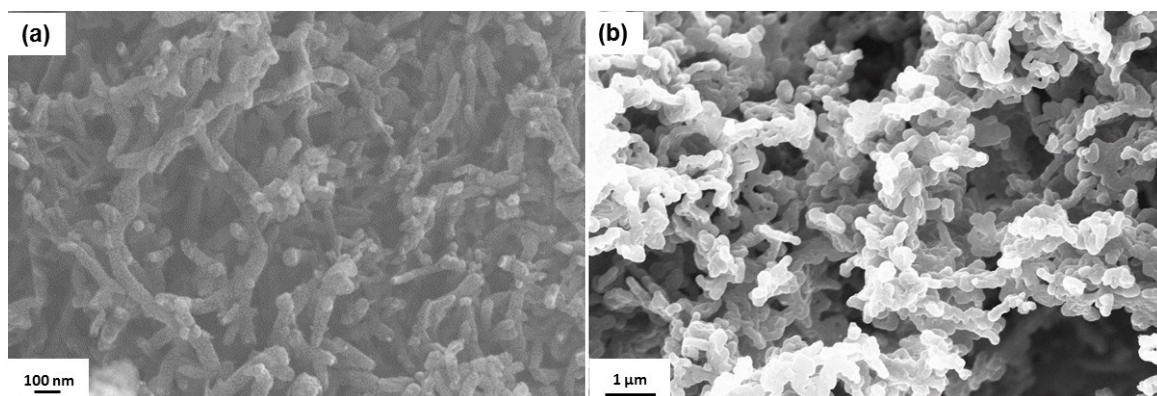

**Figure S1.** SEM images of PPy (a) and PANI (b).

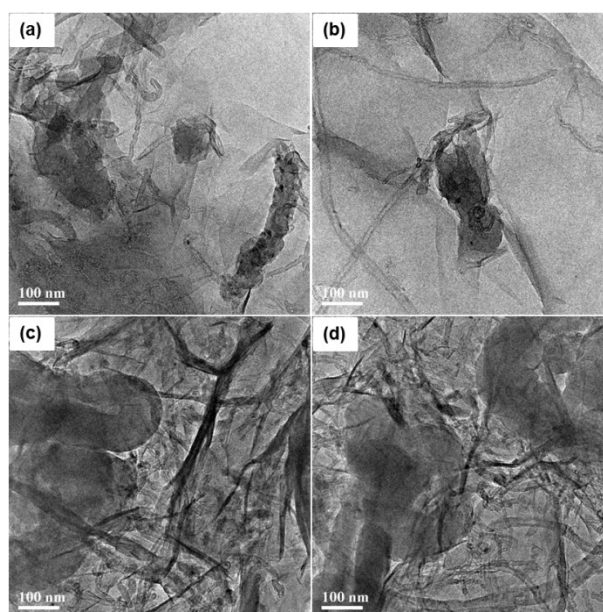

**Figure S2.** TEM images of RGO/PANI(50%) film (a), RGO/PANI(30%) film (b), RGO/PPy(50%) film (c) and RGO/PPy(30%) film(d).

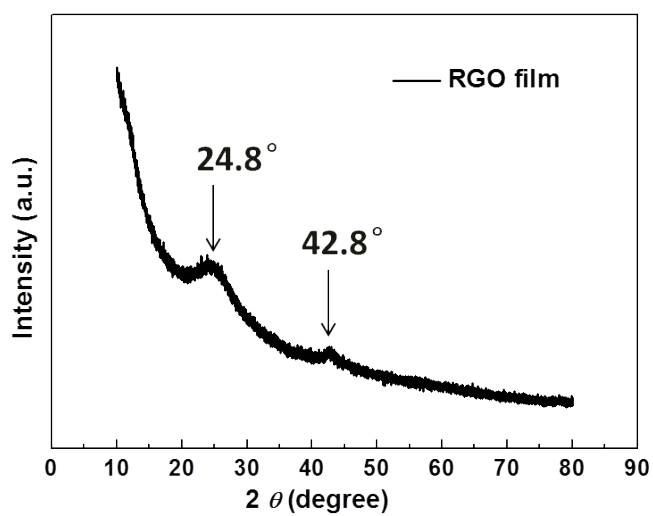

**Figure S3.** X-ray diffraction pattern of the RGO film.

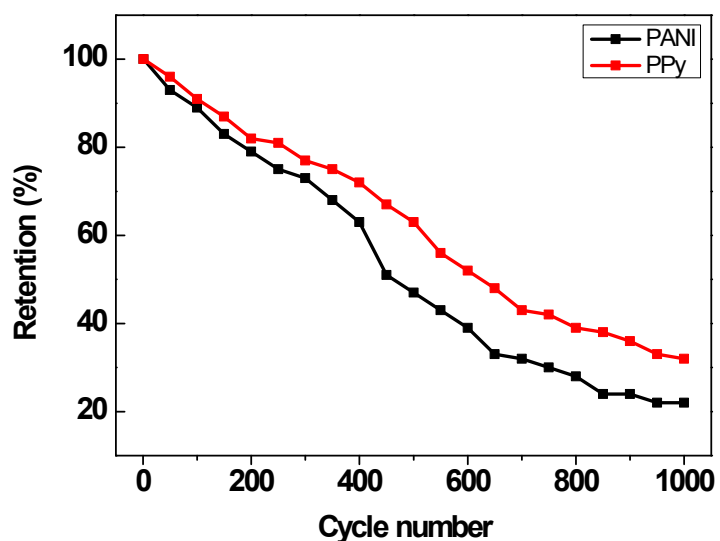

**Figure S4.** Cycling performance of pure PANI and PPy at  $2 \text{ A g}^{-1}$  in  $1 \text{ M H}_2\text{SO}_4$  (aq.), 22 and 32% of the original capacitances were retained after 1000 cycles, respectively.
